1

2 Synthetic analysis of natural variants yields insights into the evolution  
3 and function of auxin signaling F-box proteins in *Arabidopsis thaliana*

4

5 R. Clay Wright\*, Mollye L. Zahler\*, Stacey R. Gerben\* and Jennifer L. Nemhauser\*

6

7 \*Department of Biology, University of Washington, Seattle, Washington 98195-1800

8 USA

9

10

11

1 Running Title: Natural variation in auxin signaling F-box proteins

2

3 Keywords: synthetic biology; auxin-induced degradation; natural variation

4

5 Corresponding Author: Jennifer L. Nemhauser, HHMI Scholar, Department of Biology,

6 University of Washington, Box 351800, Seattle, Washington 98195-1800 USA, Phone:

7 206.543.0753, Email: [jn7@uw.edu](mailto:jn7@uw.edu)

8

9

1

## ABSTRACT

2 The evolution of complex body plans in land plants has been paralleled by gene  
3 duplication and divergence within nuclear auxin-signaling networks. A deep mechanistic  
4 understanding of auxin signaling proteins therefore may allow rational engineering of  
5 novel plant architectures. Towards that end, we analyzed natural variation in the auxin  
6 receptor F-box family of wild accessions of the reference plant *Arabidopsis thaliana* and  
7 used this information to populate a structure/function map. We employed a synthetic  
8 assay to identify natural hypermorphic F-box variants, and then assayed auxin-  
9 associated phenotypes in accessions expressing these variants. To more directly  
10 measure the impact of the strongest variant in our synthetic assay on auxin sensitivity,  
11 we generated transgenic plants expressing this allele. Together, our findings link  
12 evolved sequence variation to altered molecular performance and auxin sensitivity. This  
13 approach demonstrates the potential for combining synthetic biology approaches with  
14 quantitative phenotypes to harness the wealth of available sequence information and  
15 guide future engineering efforts of diverse signaling pathways.

16

## INTRODUCTION

17 Auxin controls many aspects of plant development and environmental  
18 adaptation. Natural and synthetic auxins have been used to control plant growth in  
19 fields, greenhouses and laboratories for nearly a century. In recent years, the gene  
20 families of biosynthetic and metabolic enzymes, transporters and perception machinery  
21 that determine the spatial, temporal and developmental specificity of auxin signals have  
22 been identified (Enders and Strader 2015). Recent work has just begun to determine

1 how functionally robust the auxin signaling machinery is to mutation (Yu *et al.* 2013,  
2 2015; Dezfulian *et al.* 2016), and to measure the propensity for mutations to produce  
3 novel plant phenotypes that result in evolutionary innovation (Delker *et al.* 2010; Rosas  
4 *et al.* 2013). As auxin effects are so wide-ranging, it is not surprising to find that  
5 significant variation exists in auxin sensitivity and auxin-induced transcription across *A.*  
6 *thaliana* accessions (Delker *et al.* 2010), perhaps contributing to morphological diversity.  
7 As such mapping evolutionary trajectories in auxin signaling could facilitate the  
8 engineering of numerous plant traits, such as root architecture, shoot branching or leaf  
9 venation—all traits associated with crop yield (Mathan *et al.* 2016).

10 Auxin is perceived by a coreceptor complex consisting of an F-box protein  
11 (TRANSPORT INHIBITOR RESPONSE1/AUXIN SIGNALING F-BOXES, TIR1/AFB;  
12 hereafter referred to as AFBs), an auxin molecule and a member of a transcriptional  
13 coreceptor/corepressor family (AUXIN/INDOLE-3-ACETIC ACID PROTEINS,  
14 Aux/IAAs). The F-box domain of the AFB associates with a Skp/Cullin/F-box (SCF)  
15 ubiquitin ligase complex that facilitates ubiquitination of the Aux/IAA proteins, targeting  
16 them for degradation (Lavy and Estelle 2016). In low auxin conditions, Aux/IAA proteins  
17 interact with and repress a family of transcription factors, the Auxin Response Factors  
18 (ARFs) (Guilfoyle and Hagen 2007). Auxin response genes are turned on when local  
19 auxin accumulation triggers degradation of Aux/IAAs thereby relieving the repression on  
20 ARFs.

21 *A. thaliana* has six *AFB* genes, *TIR1* and *AFB1-AFB5* (Dharmasiri *et al.* 2005a).  
22 The N-terminal F-box domain is modular and functionally conserved in *TIR1* and *AFB2*,  
23 both of which form functional E3 ubiquitin ligase complexes with components in yeast

1 and animals (Nishimura *et al.* 2009; Zhang *et al.* 2015). The C-terminal domain of the  
2 AFBs is a leucine-rich repeat (LRR). LRR domains offer a highly evolvable scaffold for  
3 binding small molecules and proteins and perform diverse functions across all domains  
4 of life (Bella *et al.* 2008). The AFB LRR domain allows auxin sensing by interacting with  
5 both auxin and the Aux/IAA transcriptional repressor/co-receptor proteins (Dharmasiri *et*  
6 *al.* 2005a; Tan *et al.* 2007; Calderón Villalobos *et al.* 2012). The identity of the subunits  
7 and their affinity for one another governs the rate of Aux/IAA degradation which, in turn,  
8 governs transcriptional dynamics, cell fate and morphological change (Dreher *et al.*  
9 2006; Pierre-Jerome *et al.* 2014; Guseman *et al.* 2015; Galli *et al.* 2015).

10 Here, we paired an examination of the natural coding sequence variation in the  
11 AFB family with quantification of functional variation. We used a synthetic auxin-induced  
12 degradation assay in yeast to assess the function of natural variants in isolation from  
13 the rest of the auxin response network. Variants with altered function were then  
14 evaluated in their native context by quantifying auxin-associated root growth inhibition in  
15 accessions containing these polymorphisms. Finally, we directly measured the  
16 contribution to auxin sensitivity of the most hypermorphic *TIR1* allele by generating  
17 transgenic plants expressing this variant under a constitutive promoter. Through this  
18 work, we have generated a higher resolution structure/function map of the AFB family  
19 and highlighted the challenge of identifying functional divergence in highly buffered  
20 signaling pathway components using intact plants.

1

## MATERIALS AND METHODS

### 2 **Materials, media composition and general growth conditions**

3           PCRs were performed with Phusion (cloning reactions; NEB, Ipswich, MA),  
4 GoTaq (diagnostics; Promega, Madison, WI) or GemTaq (genotyping; MGQuest,  
5 Lynnwood, WA) with primers from IDT (Coralville, Iowa). Media were standard  
6 formulations as described in (Pierre-Jerome *et al.* 2017). Plants were grown on 0.5x LS  
7 media (Caisson Laboratories, Smithfield, UT) containing 0.5% sucrose and 0.7%  
8 phytoagar (plantmedia, Dublin, OH). Seeds were obtained from the Arabidopsis  
9 Biological Resource Center (Columbus, OH).

### 10 **Analysis of sequence variation**

11           A reference dataset of the genome locations of the TIR1/AFB family and COI1  
12 was assembled from the TAIR10 database on 28 July 2015. Transcript and coding  
13 sequences were identified using the ENSEMBL biomart version of TAIR10. The 1001  
14 genomes Salk dataset (28 June 2010) was obtained from <http://1001genomes.org/>.  
15 Single nucleotide polymorphisms (SNPs) and one base pair deletions with a quality  
16 (PHRED) score of 25 and above (i.e. "quality\_variant\_filtered" files) were used for the  
17 following analysis using a custom R scripts unless otherwise specified. SNPs located in  
18 genes of interest were isolated and mapped to their respective gene structures using  
19 the VariantAnnotation package (Obenchain *et al.* 2014). Coding variants were identified  
20 and assembled for each gene and each accession. Nucleotide diversity, Watterson's  
21 theta and Tajima's D were calculated using the PopGenome package (Pfeifer *et al.*  
22 2014).

1 In identifying polymorphisms, TIR1/AFB genes were split into F-box and LRR  
2 domains, with the F-box defined as the N-terminus of the protein to I50 of TIR1 and the  
3 corresponding residues of the other genes according to the alignment generated by Tan  
4 et al. (Tan *et al.* 2007). The N-terminal extension of AFB4 and 5 were excluded.

5 For functional analysis, nonsynonymous polymorphisms in *TIR1* and *AFB2* were  
6 isolated. As domain swap experiments revealed that the F-box regions of TIR1 and  
7 AFB2 confer highly similar or identical function in yeast (S4 Fig), we focused our  
8 analysis on variants within the LRR domain. Highly represented and potentially  
9 functionally divergent nonsynonymous polymorphisms were then identified by creating a  
10 dN/dS matrix of all-by-all pairs of accessions for each gene using the kaks function  
11 within the seqinr R-package (Charif and Lobry 2007), which implements the method of  
12 Nei and Gojobori (Nei and Gojobori 1986). Incalculable and infinite values were  
13 excluded from these matrices prior to extraction of outlier pairs and associated  
14 nonsynonymous polymorphisms. This set of TIR1 and AFB2 polymorphisms was then  
15 cloned into yeast expression vectors and functionally characterized as described below.  
16 The remaining polymorphisms were subsequently cloned and characterized (Fig S6 and  
17 S7). Annotated code and supplemental data are in S11 Appendix.

## 18 **Strain construction**

19 Plasmids were designed using j5 (Hillson *et al.* 2012) and constructed by  
20 aquarium ([www.aquarium.bio](http://www.aquarium.bio)). TIR1 and AFB2 were separately inserted into pGP8G  
21 (Havens *et al.* 2012) downstream of a GPD promoter and followed by 3X-FLAG-6X-HIS  
22 tandem affinity purification tag, via Golden Gate cloning (Engler *et al.* 2009). Mutations  
23 were introduced into the parent vectors via two-fragment Gibson assembly (Gibson *et*

1 *al.* 2009). The coding sequence of the gene of interest was confirmed by sequencing  
2 (Genewiz, South Plainfield, NJ).

3 Plasmids were digested with *PmeI* before Lithium PEG (37) transformation into  
4 W303-1A ADE2+ yeast (MAT $\alpha$ , leu2-3,112 trp1-1 can1-100 ura3-1 his3-11,15 ybp1-1).  
5 Correct integration of transformed colonies was confirmed by diagnostic PCR across  
6 the 3' boundary of homologous recombination, relative to the gene of interest. Similarly,  
7 pGP4GY-IAA1 and -IAA17 (Havens *et al.* 2012) were transformed into W814-29B yeast  
8 (MAT $\alpha$  ade2-1 trp1-1 can1-100 ura3-1 leu2-3,112 his3-11,15). Confirmed transformants  
9 were struck to isolation on YPAD plates. *AFB* strains were individually mated with each  
10 *Aux/IAA* strain using standard methods (Pierre-Jerome *et al.* 2016).

### 11 **Auxin-induced degradation assays in yeast**

12 Assays were essentially as described in (Pierre-Jerome *et al.* 2017) using a BD  
13 special order cytometer with a 514 nm laser exciting fluorescence that is cutoff at 525  
14 nm prior to PMT collection (Becton-Dickinson, Franklin Lakes, NJ). Events were  
15 annotated, subset to singlet yeast, and normalized to initial levels of fluorescence using  
16 the flowTime R package (<http://www.github.com/wrightrc/flowTime>). Full dataset is  
17 available via FlowRepository (<http://tinyurl.com/j268y5e>). Additional detail in S11  
18 Appendix.

### 19 **Western blot analyses**

20 Yeast cultures that had been incubated overnight in SC media were diluted to  
21 OD<sub>600</sub> = 0.6 and incubated until cultures reached OD<sub>600</sub> ~ 1. Cells were harvested by  
22 centrifugation from four milliliters of culture. Cells were then lysed by vortexing for five  
23 minutes at 4°C in the presence of 100  $\mu$ L of 0.5 mm diameter acid washed glass beads



1 and 200  $\mu$ L SUMEB buffer (1% SDS, 8 M urea, 10 mM MOPS pH 6.8, 10 mM EDTA,  
2 0.01% bromophenol blue) per 1 OD unit of original culture. Lysates were then incubated  
3 at 65°C for ten minutes and cleared by centrifugation prior electrophoresis and blotting  
4 (Sambrook and Russell 2001). Mouse anti-FLAG M2 monoclonal primary antibodies  
5 (Sigma-Aldrich, St. Louis, MO) were used at a 1:1000 dilution per the manufacturer's  
6 directions.

### 7 **Root growth inhibition assays**

8 After sterile seeds were stratified on plates oriented vertically at 4°C in the dark  
9 for 3 days (or 1 week for wild accessions), they were transferred to long day conditions  
10 at 20°C for 4 days. Ten plants each of 4 different genotypes were then transferred in  
11 two rows to plates containing either DMSO carrier or 2,4-dichlorophenoxyacetic acid (2,4-  
12 D) with root tips aligned to a reference mark for each row. Plants were scanned after an  
13 additional 3 days of incubation. Plates were regularly rotated during incubation to avoid  
14 position effects. Root growth was measured using ImageJ (Rasband 1997) and an  
15 Intuos Pro drawing pad (Wacom, Portland, Oregon). Additional detail can be found in  
16 S11 Appendix. The experiment in Fig 3A-C was repeated on two different days. The  
17 experiments in Fig 3D were repeated on three different days for T2 lines and five  
18 different days to T3 lines.

### 19 **Construction and analysis of transgenic plants**

20 Genes of interest were inserted via Golden Gate cloning (Engler *et al.* 2009) into  
21 pGreenII (Hellens *et al.* 2000) with a pUBQ10 promoter (Grefen *et al.* 2010) and 3X-  
22 FLAG-6X-HIS tandem affinity purification tag. Plasmids were transformed into  
23 *Agrobacterium tumefactions* GV3101 containing pSOUP (Hellens *et al.* 2000) via

1 electroporation, and transformants were selected on plates with 50 µg/mL gentamycin  
2 and 25 µg/mL kanamycin. Plants were transformed by floral dip (Zhang *et al.* 2006), and  
3 transformants were selected on plates with 30 µg/mL hygromycin at four days post  
4 germination after an initial light exposure for seven hours. Root growth inhibition  
5 phenotypes were quantified in T2 generation of three independent transformants as  
6 described above. Each plant was genotyped for the presence of the hygromycin  
7 resistance gene after the growth assay, using the forward primer  
8 (GATGTTGGCGACCTCGTATT) and the reverse primer  
9 (GTGCTTGACATTGGGGAGTT). Expression levels in T3 lines were measured by  
10 quantitative PCR. RNA was isolated from the tissue from young leaves of T3 plants  
11 using illustra RNAspin Mini RNA Isolation Kit (GE Healthcare, Little Chalfont, United  
12 Kingdom) and reverse transcribed using iScript cDNA synthesis kit (Bio-rad, Hercules,  
13 California). Quantitative PCR was performed using iQ SYBR Green supermix (Bio-rad,  
14 Hercules, California) and primers for *TIR1* (f-CACGGAACAAGAAGACATCCAAAGG, r-  
15 TGAGGAAACTAGAGATAAGGGACTGC) or *PP2A* (f-AACGTGGCCAAAATGATGC, r-  
16 AACCGCTTGGTCGACTATCG) in a CFX96 Touch Real-Time PCR detection system  
17 (Bio-rad, Hercules, California).

18 Plasmids, strains and sequence files are available upon request or via Addgene.  
19 All code used to perform analysis and visualization is provided in S11 Appendix. All data  
20 including raw images are available upon request.

## RESULTS

1  
2 We identified polymorphisms across the entire AFB gene family in the 170 *A.*  
3 *thaliana* accessions of the SALK subset of the 1001 Genomes Project (Schmitz *et al.*  
4 2013). The AFB gene family is highly conserved relative to other auxin signaling gene  
5 families (Delker *et al.* 2010). We found 1,631 total polymorphisms within coding regions  
6 and 175 segregating sites across the whole family (S1 Table and S2 Fig). *AFB3* had the  
7 highest ratio of per site diversity at nonsynonymous sites relative to synonymous sites.  
8 *AFB4*, critical for response to the synthetic auxin picloram (Prigge *et al.* 2016), had the  
9 highest nonsynonymous diversity (more than 10X that of *TIR1*) and the only two  
10 nonsense polymorphisms identified in this dataset. In contrast, *AFB1*, which is largely  
11 incapable of forming a functional SCF complex (Yu *et al.* 2015), has similar ratio of  
12 nonsynonymous to synonymous diversity as *TIR1*. Many of the accessions contained  
13 nonsynonymous polymorphisms in multiple members of the AFB family (S5 Table).  
14 These additional polymorphisms occurred more frequently in *TIR1/AFB1* and  
15 *AFB2/AFB3* sister pairs than expected (permutation analysis,  $p < 0.05$ , S11 Appendix  
16 section “Assessing covariation...”).

17 None of the identified accessions have nonsynonymous polymorphisms in both  
18 *TIR1* and *AFB2* (S5 Table), an unlikely pattern to occur by chance (permutation  
19 analysis,  $p < 0.05$ , S11 Appendix section “Assessing covariation...”). This may reflect the  
20 fact that *AFB2* and *TIR1* are the major auxin receptors and serve partially redundant  
21 functions, a conclusion supported by genetic analysis (Dharmasiri *et al.* 2005a; Parry *et*  
22 *al.* 2009). The majority of the nonsynonymous polymorphisms in *TIR1* and *AFB2*  
23 occurred in positions of high diversity across the Col-0 AFB family, and most were

1 located in surface residues of the LRR domain (Fig 1A). The majority of these  
2 polymorphisms spanned the exterior helices and loops of the fourth through eighth  
3 LRRs, which face the Cullin subunit (Fig 1B and 1C). This region was recently identified  
4 as being responsible for SCF<sup>TIR1</sup> dimerization (Dezfulian *et al.* 2016) and is also  
5 proximal to the S-nitrosylation site (Terrile *et al.* 2012). A pair of polymorphisms exists  
6 on the surface spanning the final three LRRs and the C-terminal cap (Fig 1D). This  
7 region may interact with the KR motif known to strongly affect auxin-induced  
8 degradation rates (Dreher *et al.* 2006; Moss *et al.* 2015). A final pair of polymorphisms  
9 was found on the interior surface of the LRR domain horseshoe (Fig 1E).

## 10 **Synthetic yeast assays reveal functional variation in TIR1 and AFB2**

11 An auxin-induced degradation assay has been established in yeast using  
12 heterologous expression of either *TIR1* or *AFB2* (Havens *et al.* 2012). We used this  
13 synthetic assay to quantify the function of AFB natural variants in the absence of the  
14 potentially confounding effects of feedback from the auxin pathway itself or from  
15 modulation by other integrating pathways. Natural variants were engineered into the  
16 Col-0 reference sequence with co-occurring polymorphisms cloned individually and in  
17 combination. Each AFB was then constitutively co-expressed in yeast with fluorescently  
18 labeled Aux/IAA targets. Auxin-induced degradation was measured for two targets,  
19 IAA1 and IAA17, as these substrates show distinct patterns of behavior when assayed  
20 with Col-0 TIR1 and AFB2. TIR1<sup>Col</sup> induces degradation of IAA1 and IAA17 at similar  
21 rates, while AFB2<sup>Col</sup> causes IAA17 to degrade much faster than what is observed for  
22 IAA1 (Havens *et al.* 2012). We focused on polymorphisms in the LRR domain that were

1 predicted to be functionally divergent (having any pairwise  $d_N/d_S$  value greater than  
2 one), but analysis of the few additional polymorphisms is shown in Figures S6 and S7.

3         Some natural variants increased function compared to the Col-0 reference, while  
4 others decreased or nearly abrogated function (referred to hereafter as hypermorphs,  
5 hypomorphs and amorphs, respectively) (Fig 2). Of the *TIR1* polymorphisms, T154S  
6 was hypermorphic and E239K-S546L was strongly hypomorphic (Fig 2A). E239K alone  
7 was nearly amorphic, and adding S546L only slightly restored activity. These  
8 polymorphic *TIR1* variants are expressed at similar levels to *TIR1*<sup>Col</sup> (S8 Fig). Among  
9 the *AFB2* polymorphisms, T491R was the only clear hypermorph identified (Fig 2B).  
10 D176E was slightly hypermorphic, whereas A254V was a moderate hypomorph. In  
11 combination, these two polymorphisms were largely additive, giving a response quite  
12 similar to *AFB2*<sup>Col</sup>. *AFB2*<sup>Q169L</sup> was also a moderate hypomorph. Two *AFB2* alleles,  
13 R396C and R204K, were strong hypomorphs, and T179M was amorphic in our assays.  
14 Interestingly, the two most highly represented variants, *TIR1*<sup>T154S</sup> (present in 5  
15 accessions) and *AFB2*<sup>R204K</sup> (6 accessions), show strong functional divergence from their  
16 respective wild-type proteins.

## 17 **Accessions containing a hypermorphic *TIR1* allele are hypersensitive to** 18 **auxin**

19         We next assessed whether the functional variation observed in the synthetic  
20 assays was manifested as phenotypic differences in the respective accessions. As  
21 there are many polymorphisms between accessions and previous genome-wide  
22 association studies of auxin response have not identified the *AFB* family (Rosas *et al.*  
23 2013; Meijón *et al.* 2014), we did not expect a strong correlation between genotype and

1 phenotype from our analysis. To increase the sensitivity and precision of the test, we  
2 measured inhibition of primary root growth in the presence of exogenous auxin and fit a  
3 log-logistic dose response model to the data. Similar bioassays have been used  
4 extensively to identify and characterize mutants in the *AFB* gene family (Gray *et al.*  
5 1999; Dharmasiri *et al.* 2005a; b; Parry *et al.* 2009). The effective dose of auxin required  
6 to elicit fifty percent of the maximum root growth inhibition (ED50) was the most  
7 effective parameter in our model for differentiating among genotypes. Two *tir1* mutants  
8 in the Col-0 background (a point mutation *tir1-1* and a T-DNA insertion *tir1-10*) were  
9 also included in our analysis. Both mutants had significantly higher ED50 values than  
10 Col-0, as expected (Fig 3A and C). A loss of function *afb2* allele did not significantly  
11 affect the root growth response in our assays, although *tir1-1 afb2-3* double mutants  
12 had a much larger ED50 than the *tir1-1* single mutant.

13 Four out of five accessions carrying *TIR1*<sup>T154S</sup> were hypersensitive to auxin,  
14 following the pattern predicted by the hypermorphic behavior of that variant in yeast (Fig  
15 3B and C). In three of these accessions, ED50 values were quite close to one another  
16 and significantly lower than the ED50 measured for Col-0 or any other accession.  
17 However, Mc-0, which contains the strong hypomorph *TIR1*<sup>E239K-S546L</sup>, had auxin  
18 responses that were only subtly different Col-0. Consistent with the modest phenotype  
19 of *afb2-3* in our assays, auxin responses of most accessions with *AFB2* polymorphisms  
20 were essentially similar to those of Col-0 (S11 Appendix, pg. 38-40).

## 21 **A common *TIR1* allele confers auxin hypersensitivity to Col-0**

22 The aberrant auxin responses in yeast and the majority of accessions led us to  
23 hypothesize that *TIR1*<sup>T154S</sup> is a natural gain-of-function allele with the capacity to impact

1 organ-level auxin responses. To test this, we generated transgenic Col-0 lines  
2 expressing *TIR1<sup>Col</sup>* or *TIR1<sup>T154S</sup>* under a constitutive promoter. Most transgenic lines had  
3 relatively similar expression levels, although the Col-0 allele was expressed on average  
4 at modestly higher levels than the T154S variant (Fig S9). Expression level and root  
5 growth phenotypes were not strongly correlated—the lines with the lowest expression  
6 levels showed essentially similar auxin responses as lines with higher transgene  
7 expression. In the T3 generation, silencing of the endogenous *TIR1* and transgenes  
8 was observed in three lines. Two of these lines were from the family with highest  
9 transgene expression (Fig S9, TIR1-7).

10 Overall, plants expressing *TIR1<sup>T154S</sup>* had shorter roots than plants  
11 expressing *TIR1<sup>Col</sup>* even in the absence of auxin treatment, consistent with the  
12 expectation that the T154S polymorphism conferred increased sensitivity to  
13 endogenous auxin. In the T2 generation, auxin treatments in root inhibition assays  
14 confirmed that *TIR1<sup>T154S</sup>* had increased auxin sensitivity relative to *TIR1<sup>Col</sup>* (Fig 3D)  
15 (transgene:treatment effect  $F = 9.3$ ,  $p = 0.0001$ , full statistical analysis shown in S11  
16 Appendix). In the T3 generation, *TIR1<sup>T154S</sup>* expressing plants consistently had shorter  
17 roots than *TIR1<sup>Col</sup>* expressing plants (transgene effect  $F = 100.4$ ,  $p < 10^{-16}$ ); however, the  
18 difference in sensitivity to exogenous auxin when compared with *TIR1<sup>Col</sup>* expressing  
19 plants was diminished. This may be because the auxin response is near saturation even  
20 in the *TIR1<sup>Col</sup>* expressing plants in this generation. The roots of homozygous T3 plants  
21 with either transgene were much shorter and had a significantly reduced auxin response  
22 when compared with the T2 generation (Fig 3D vs. E, note especially the difference in  
23 the y-axis).

## 1 **Dimerization domain variation affects dominance relations between TIR1** 2 **alleles**

3 One of the unexpected findings in our analysis of auxin response across  
4 genotypes was a subtle but highly reproducible difference between the two induced  
5 alleles of *tir1* in the Col-0 background (Fig 3A, C). The point mutation *tir1-1* showed a  
6 consistently stronger loss of auxin sensitivity than the T-DNA insertion *tir1-10*, raising  
7 the possibility that *tir1-1* might be acting as a dominant negative or antimorph rather  
8 than as a simple loss-of function. In support of that interpretation, *tir1-1* mutants are  
9 semi-dominant (Ruegger *et al.* 1998), and the *tir1-1* allele (G147D) and several other  
10 mutations in nearby residues negatively affect SCF<sup>TIR1</sup> dimerization and activity  
11 (Dezfulian *et al.* 2016).

12 We turned to the yeast synthetic system to further investigate this question. By  
13 transforming a single copy of each allele into haploid yeast strains of each mating type,  
14 we created all pairs of alleles via mating. We also created *tir1*<sup>K159\*</sup> a mimic of the *tir1-10*  
15 T-DNA insertion allele. As expected, *tir1*<sup>K159\*</sup> was an amorph, behaving similarly to an  
16 empty expression cassette (S10 Fig). *TIR1* dosage had little effect on auxin response in  
17 these assays, as *TIR1/tir1-10* heterozygotes responded similarly to *TIR1* homozygotes  
18 (Fig 4A). In contrast, expression of *tir1-1* nearly completely abrogated *TIR1* activity (Fig  
19 4B), providing strong evidence that *tir1-1* is a dominant negative allele. In addition to  
20 having a greatly reduced ability to induce Aux/IAA degradation, it is likely that *tir1-1* is  
21 also outcompeting TIR1 for SCF complex formation and substrate binding as *tir1-1*  
22 protein accumulated to much higher levels in yeast than *TIR1* (Fig 4C).



## DISCUSSION

1  
2       The analysis of intraspecific variation in auxin sensitivity presented here critically  
3 extends previous work on the evolution of this pathway by focusing on protein level  
4 functional variation. Synthetic assays allowed for direct quantification of differences in  
5 the ability of TIR1 and AFB2 variants to facilitate ubiquitin-mediated degradation of their  
6 substrates. The creation of a structure/function map of natural variation revealed several  
7 areas of the F-box-LRR protein scaffold that can accommodate mutations, while  
8 modulating auxin sensitivity. For example, this analysis further underscored the  
9 importance of the AFB dimerization domain (Dezfulian *et al.* 2016) to regulate SCF  
10 activity.

11       The *AFB* family provides a test case for genome evolution after gene duplication,  
12 as there is evidence of both significant novelty and redundancy between family  
13 members (Dharmasiri *et al.* 2005a; Walsh *et al.* 2006; Parry *et al.* 2009; Hu *et al.* 2012).  
14 Analysis of intraspecific coding sequence polymorphisms in this study has identified a  
15 subset of the tolerated polymorphisms within the AFB family. This natural variation has  
16 also revealed potential differences in evolutionary rates across the gene family and  
17 redundancies within sister pairs. In the future, quantitative phenotyping and precision  
18 genetics will allow us to test related hypotheses and accurately partition the novel and  
19 redundant effects of individual AFB genes on developmental phenotypes. Accessions  
20 containing highly represented polymorphisms and having phenotypes not predicted by  
21 our synthetic functional analysis, should facilitate future examination of evolutionary  
22 robustness and plasticity in nuclear auxin signaling and downstream gene networks.

1           Our analysis demonstrates that functional diversification is occurring within the  
2 *Arabidopsis TIR1* lineage and clarified the role of induced variants that are commonly  
3 used for auxin studies. The integrated biochemical and phenotypic analysis of natural  
4 variants refined the map of functionally relevant residues in TIR1 and AFB2. Synthetic  
5 analysis of the chemically-induced *tir1-1* allele, which is in proximity to many of the  
6 natural polymorphisms found in *TIR1* and *AFB2*, has established *tir1-1* as a dominant  
7 negative allele and highlighted the potential importance of interactions among family  
8 members to the auxin response.

9           The auxin pathway in *Arabidopsis*, like many critical signaling pathways across  
10 eukaryotes, has high levels of redundancy at each node and numerous modes of  
11 feedback. Together these factors act as strong buffers masking functional changes in  
12 any one component. This effect likely explains the discrepancies between synthetic and  
13 plant phenotypes in this study. Similar factors may also contribute to the lack of  
14 *TIR1/AFB* genes identified in genome-wide association studies. Candidate gene  
15 approaches incorporating isolated functional assays as demonstrated here can  
16 complement genome-wide approaches by removing feedback and other compensatory  
17 effects. Future efforts that combine synthetic assays with higher throughput allelic  
18 replacement technologies in plants (Čermák *et al.* 2017) would substantially increase  
19 the ability to precisely compare the impact of a given variant in isolation and in a  
20 common plant context.

21           Extending this pipeline for structure/function and genotype/phenotype mapping to  
22 additional auxin signaling genes and developmental phenotypes will improve our  
23 understanding of how plant form is shaped by this small molecule. This information,

1 along with the general evolvability of the LRR scaffold (Bella *et al.* 2008), make the  
2 AFBs potential candidates for engineering novel traits in crops (Sun *et al.* 2016).

### 3 ACKNOWLEDGEMENTS

4 We thank Doug Fowler, Adam Leaché and Eric Klavins for guidance on methods,  
5 analysis and interpretation of our findings; members of the Nemhauser, Klavins and  
6 Imaizumi Labs for helpful discussions; and Brenda Martinez for technical assistance.  
7 This work was supported by the National Institute of Health (R01-GM107084), the  
8 National Science Foundation (MCB-1411949) and the Howard Hughes Medical  
9 Institute. R.C.W. received fellowship support from the National Science Foundation  
10 (DBI-1402222).

### 11 REFERENCES

- 12 Bella J., Hindle K. L., McEwan P. A., Lovell S. C., 2008 The leucine-rich repeat  
13 structure. *Cell. Mol. Life Sci.* 65: 2307–2333.
- 14 Calderón Villalobos L. I. A., Lee S., De Oliveira C., Ivetac A., Brandt W., *et al.*, 2012 A  
15 combinatorial TIR1/AFB-Aux/IAA co-receptor system for differential sensing of  
16 auxin. *Nat Chem Biol* 8: 477–85.
- 17 Čermák T., Curtin S. J., Gil-Humanes J., Čegan R., Kono T. J. Y., *et al.*, 2017 A  
18 Multipurpose Toolkit to Enable Advanced Genome Engineering in Plants. *Plant*  
19 *Cell Online* 29: 1196–1217.
- 20 Charif D., Lobry J. R., 2007 SeqinR 1.0-2: a contributed package to the R project for  
21 statistical computing devoted to biological sequences retrieval and analysis. In:  
22 Bastolla U, Porto M, Roman HE, Vendruscolo M (Eds.), *Structural approaches to*  
23 *sequence evolution: Molecules, networks, populations*, Biological and Medical  
24 Physics, Biomedical Engineering. Springer Verlag, New York, pp. 207–232.
- 25 Delker C., Pöschl Y., Raschke A., Ullrich K., Ettingshausen S., *et al.*, 2010 Natural  
26 Variation of Transcriptional Auxin Response Networks in *Arabidopsis thaliana*.  
27 *Plant Cell* 22: 2184–2200.

- 1 Dezfulian M. H., Jalili E., Roberto D. K. A., Moss B. L., Khoo K., *et al.*, 2016  
2 Oligomerization of SCF TIR1 Is Essential for Aux/IAA Degradation and Auxin  
3 Signaling in Arabidopsis. *PLOS Genet* 12: e1006301.
- 4 Dharmasiri N., Dharmasiri S., Weijers D., Lechner E., Yamada M., *et al.*, 2005a Plant  
5 Development Is Regulated by a Family of Auxin Receptor F Box Proteins. *Dev.*  
6 *Cell* 9: 109–119.
- 7 Dharmasiri N., Dharmasiri S., Estelle M., 2005b The F-box protein TIR1 is an auxin  
8 receptor. *Nature* 435: 441–445.
- 9 Dreher K. A., Brown J., Saw R. E., Callis J., 2006 The Arabidopsis Aux/IAA Protein  
10 Family Has Diversified in Degradation and Auxin Responsiveness. *Plant Cell* 18:  
11 699–714.
- 12 Enders T. A., Strader L. C., 2015 Auxin activity: Past, present, and future. *Am. J. Bot.*  
13 102: 180–196.
- 14 Engler C., Gruetzner R., Kandzia R., Marillonnet S., 2009 Golden Gate Shuffling: A  
15 One-Pot DNA Shuffling Method Based on Type IIs Restriction Enzymes. *PLoS*  
16 *ONE* 4: e5553.
- 17 Galli M., Liu Q., Moss B. L., Malcomber S., Li W., *et al.*, 2015 Auxin signaling modules  
18 regulate maize inflorescence architecture. *Proc. Natl. Acad. Sci.*: 201516473.
- 19 Gibson D. G., Young L., Chuang R.-Y., Venter J. C., Hutchison C. A., *et al.*, 2009  
20 Enzymatic assembly of DNA molecules up to several hundred kilobases. *Nat.*  
21 *Methods* 6: 343–345.
- 22 Gray W. M., Pozo J. C. del, Walker L., Hobbie L., Risseuw E., *et al.*, 1999 Identification  
23 of an SCF ubiquitin-ligase complex required for auxin response in Arabidopsis  
24 thaliana. *Genes Dev* 13: 1678–91.
- 25 Grefen C., Donald N., Hashimoto K., Kudla J., Schumacher K., *et al.*, 2010 A ubiquitin-  
26 10 promoter-based vector set for fluorescent protein tagging facilitates temporal  
27 stability and native protein distribution in transient and stable expression studies.  
28 *Plant J.* 64: 355–365.
- 29 Guilfoyle T. J., Hagen G., 2007 Auxin response factors. *Curr. Opin. Plant Biol.* 10: 453–  
30 460.
- 31 Guseman J. M., Hellmuth A., Lanctot A., Feldman T. P., Moss B. L., *et al.*, 2015 Auxin-  
32 induced degradation dynamics set the pace for lateral root development.  
33 *Development* 142: 905–909.
- 34 Havens K. A., Guseman J. M., Jang S. S., Pierre-Jerome E., Bolten N., *et al.*, 2012 A  
35 synthetic approach reveals extensive tunability of auxin signaling. *Plant Physiol*  
36 160: 135–42.

- 1 Hellens R. P., Edwards E. A., Leyland N. R., Bean S., Mullineaux P. M., 2000 pGreen: a  
2 versatile and flexible binary Ti vector for Agrobacterium-mediated plant  
3 transformation. *Plant Mol. Biol.* 42: 819–832.
- 4 Hillson N. J., Rosengarten R. D., Keasling J. D., 2012 j5 DNA Assembly Design  
5 Automation Software. *ACS Synth. Biol.* 1: 14–21.
- 6 Hu Z., Keçeli M. A., Piisilä M., Li J., Survila M., *et al.*, 2012 F-box protein AFB4 plays a  
7 crucial role in plant growth, development and innate immunity. *Cell Res.* 22: 777–  
8 781.
- 9 Lavy M., Estelle M., 2016 Mechanisms of auxin signaling. *Development* 143: 3226–  
10 3229.
- 11 Mathan J., Bhattacharya J., Ranjan A., 2016 Enhancing crop yield by optimizing plant  
12 developmental features. *Development* 143: 3283–3294.
- 13 Meijón M., Satbhai S. B., Tsuchimatsu T., Busch W., 2014 Genome-wide association  
14 study using cellular traits identifies a new regulator of root development in  
15 *Arabidopsis*. *Nat. Genet.* 46: 77–81.
- 16 Moss B. L., Mao H., Guseman J. M., Hinds T. R., Hellmuth A., *et al.*, 2015 Rate Motifs  
17 Tune Auxin/Indole-3-Acetic Acid Degradation Dynamics. *Plant Physiol.* 169: 803–  
18 813.
- 19 Nei M., Gojobori T., 1986 Simple methods for estimating the numbers of synonymous  
20 and nonsynonymous nucleotide substitutions. *Mol. Biol. Evol.* 3: 418–426.
- 21 Nishimura K., Fukagawa T., Takisawa H., Kakimoto T., Kanemaki M., 2009 An auxin-  
22 based degron system for the rapid depletion of proteins in nonplant cells. *Nat.*  
23 *Methods* 6: 917–922.
- 24 Obenchain V., Lawrence M., Carey V., Gogarten S., Shannon P., *et al.*, 2014  
25 VariantAnnotation: a Bioconductor package for exploration and annotation of  
26 genetic variants. *Bioinformatics* 30: 2076–2078.
- 27 Parry G., Calderon-Villalobos L. I., Prigge M., Peret B., Dharmasiri S., *et al.*, 2009  
28 Complex regulation of the TIR1/AFB family of auxin receptors. *Proc. Natl. Acad.*  
29 *Sci.* 106: 22540–22545.
- 30 Pfeifer B., Wittelsbürger U., Ramos-Onsins S. E., Lercher M. J., 2014 PopGenome: An  
31 Efficient Swiss Army Knife for Population Genomic Analyses in R. *Mol. Biol. Evol.*  
32 31: 1929–1936.
- 33 Pierre-Jerome E., Jang S. S., Havens K. A., Nemhauser J. L., Klavins E., 2014  
34 Recapitulation of the forward nuclear auxin response pathway in yeast. *Proc.*  
35 *Natl. Acad. Sci.* 111: 9407–9412.

- 1 Pierre-Jerome E., Moss B. L., Lanctot A., Hageman A., Nemhauser J. L., 2016  
2 Functional analysis of molecular interactions in synthetic auxin response circuits.  
3 Proc. Natl. Acad. Sci. U. S. A. 113: 11354–11359.
- 4 Pierre-Jerome E., Wright R. C., Nemhauser J., 2017 Characterizing Auxin Response  
5 Circuits in *Saccharomyces cerevisiae* by Flow Cytometry. In: Kleine-Vehn J,  
6 Sauer M (Eds.), *Plant Hormones*, Methods in Molecular Biology. Springer New  
7 York, pp. 271–281.
- 8 Prigge M. J., Greenham K., Zhang Y., Santner A., Castillejo C., *et al.*, 2016 The  
9 Arabidopsis Auxin Receptor F-Box Proteins AFB4 and AFB5 Are Required for  
10 Response to the Synthetic Auxin Picloram. *G3 GenesGenomesGenetics* 6:  
11 1383–1390.
- 12 Rasband W., 1997 *ImageJ*. U. S. National Institutes of Health, Bethesda, Maryland,  
13 USA.
- 14 Rosas U., Cibrian-Jaramillo A., Ristova D., Banta J. A., Gifford M. L., *et al.*, 2013  
15 Integration of responses within and across Arabidopsis natural accessions  
16 uncovers loci controlling root systems architecture. Proc. Natl. Acad. Sci. 110:  
17 15133–15138.
- 18 Ruegger M., Dewey E., Gray W. M., Hobbie L., Turner J., *et al.*, 1998 The TIR1 protein  
19 of Arabidopsis functions in auxin response and is related to human SKP2 and  
20 yeast Grr1p. *Genes Dev.* 12: 198–207.
- 21 Sambrook J., Russell D. W., 2001 *Molecular Cloning: A Laboratory Manual*. CSHL  
22 Press.
- 23 Schmitz R. J., Schultz M. D., Urich M. A., Nery J. R., Pelizzola M., *et al.*, 2013 Patterns  
24 of population epigenomic diversity. *Nature* 495: 193–198.
- 25 Sun C., Wang B., Wang X., Hu K., Li K., *et al.*, 2016 Genome-Wide Association Study  
26 Dissecting the Genetic Architecture Underlying the Branch Angle Trait in  
27 Rapeseed (*Brassica napus* L.). *Sci. Rep.* 6: 33673.
- 28 Tan X., Calderon-Villalobos L. I. A., Sharon M., Zheng C., Robinson C. V., *et al.*, 2007  
29 Mechanism of auxin perception by the TIR1 ubiquitin ligase. *Nature* 446: 640–5.
- 30 Terrile M. C., París R., Calderón-Villalobos L. I. A., Iglesias M. J., Lamattina L., *et al.*,  
31 2012 Nitric oxide influences auxin signaling through S-nitrosylation of the  
32 Arabidopsis TRANSPORT INHIBITOR RESPONSE 1 auxin receptor. *Plant J.*  
33 *Cell Mol. Biol.* 70: 492–500.
- 34 Walsh T. A., Neal R., Merlo A. O., Honma M., Hicks G. R., *et al.*, 2006 Mutations in an  
35 Auxin Receptor Homolog AFB5 and in SGT1b Confer Resistance to Synthetic  
36 Picolinate Auxins and Not to 2,4-Dichlorophenoxyacetic Acid or Indole-3-Acetic  
37 Acid in Arabidopsis. *Plant Physiol.* 142: 542–552.

- 1 Yu H., Moss B. L., Jang S. S., Prigge M., Klavins E., *et al.*, 2013 Mutations in the TIR1  
2 Auxin Receptor That Increase Affinity for Auxin/Indole-3-Acetic Acid Proteins  
3 Result in Auxin Hypersensitivity. *Plant Physiol.* 162: 295–303.
- 4 Yu H., Zhang Y., Moss B. L., Bargmann B. O. R., Wang R., *et al.*, 2015 Untethering the  
5 TIR1 auxin receptor from the SCF complex increases its stability and inhibits  
6 auxin response. *Nat. Plants* 1: 14030.
- 7 Zhang X., Henriques R., Lin S., Niu Q., Chua N., 2006 *Agrobacterium*-mediated  
8 transformation of *Arabidopsis thaliana* using the floral dip method. *Nat. Protoc.* 1:  
9 641–6.
- 10 Zhang L., Ward J. D., Cheng Z., Dernburg A. F., 2015 The auxin-inducible degradation  
11 (AID) system enables versatile conditional protein depletion in *C. elegans*. *Dev.*  
12 *Camb. Engl.*

13

## FIGURE CAPTIONS

- 14 **Fig 1. Clusters of natural variation in *TIR1* and *AFB2*.** (A) Identified nonsynonymous polymorphisms  
15 tend to occur in residues of high diversity within the *Arabidopsis* AFB family. A top down view of the LRR  
16 domain of the TIR1 structure (PDB:2P1Q) is shown with the F-box domain in the bottom right and the  
17 LRR domain spiraling counterclockwise. The backbone of the TIR1 structure (Tan *et al.* 2007) was  
18 colored according to protein sequence diversity with conserved residues in blue and diverging residues in  
19 red. Diversity was calculated as Shannon Entropy using an alignment of the protein sequences of the  
20 *Arabidopsis* AFB family (TIR1, AFB1-5). All nonsynonymous polymorphisms are shown as sticks. AFB2  
21 variants are in light blue and TIR1 variants are in purple. Previously identified TIR1 mutations are in dark  
22 blue (Ruegger *et al.* 1998; Yu *et al.* 2013). The IAA7 degron is shown as a light green ribbon with side-  
23 chains as sticks. The N-terminal residue of the IAA7 degron is in lighter green and the C-terminal residue  
24 is darker green. Circles around polymorphisms match the detailed views shown in panels C, D and E. (B)  
25 Polymorphisms face the Cullin subunit of the predicted SCF<sup>TIR1</sup> structure. ASK1 (light grey) was aligned  
26 with SKP1 from the human SKP2-SKP1-Cul1-RBX1 structure (PDB: 1LDK, shown in dark grey), docking  
27 with TIR1 (gold). Putative E2 location is labeled. (C) The dimerization domain on the N-terminal side of  
28 the LRR horseshoe contains the majority of natural variation in *TIR1* and *AFB2*. The *tir1-1* allele (*tir1*<sup>G147D</sup>)  
29 is in light purple. (D) Two variants were located on the C-terminal side of the LRR close to the N-terminus

1 of the degron. (E) Two additional variants were located inside the LRR horseshoe, near the inositol-  
2 hexakisphosphate cofactor.

3 **Fig 2. Synthetic assays reveal significant functional variation in naturally occurring *AFB***

4 **polymorphisms.** Nonsynonymous polymorphisms in the LRR domains of *TIR1* (A) and *AFB2* (B) were  
5 synthesized and co-expressed in yeast with fluorescently labeled IAA1 or IAA17. Degradation was  
6 assessed using flow cytometry on cultures exposed to different concentrations of the auxin indole-3-  
7 acetic acid (IAA) for one hour. Error bars represent 95% confidence intervals around the median  
8 fluorescence calculated from three independent experiments. In many cases, intervals are small enough  
9 that they appear as a single line. The reference Col-0 variant is shown in grey.

10 **Fig 3. Auxin sensitivity varies only subtly in wild accessions.** (A and B) The impact of auxin on root

11 growth (normalized to mock treated controls) was measured in 8-day-old seedlings. Results from two  
12 biological replicates, each containing ten plants per treatment level, are shown. Each measurement is  
13 shown as a transparent grey point. Solid lines represent log-logistic dose response model fits with a  
14 lighter ribbon indicating 95% confidence intervals. The Col-0 curve is reproduced in light grey in each  
15 panel to facilitate comparisons. (A) Assays on the reference accession Col-0, and mutants in the Col-0  
16 background, are shown (B) Auxin sensitivity of accessions containing the hypermorphic *TIR1*<sup>T154S</sup> allele.  
17 (C) Estimated ED50 values for selected accessions and controls. Parameters were compared  
18 ratiometrically to Col-0 and one-sample t-tests were used to estimate the likelihood that the ratio of  
19 parameters equals 1. P-values were corrected for multiple testing using the Benjamini-Hochberg method.  
20 (D and E) A natural polymorphism was sufficient to alter auxin sensitivity in plants. Mean root growth  
21 (large points) and 95% confidence intervals (error bars) are shown on top of a violin plot representing the  
22 distribution of all measurements. All transgenes were expressed under the pUBQ10 promoter. The  
23 number of plants measured for each condition is shown above the X-axis with individual measurements  
24 indicated by small points. (D) Three experimental replicates were performed with T2 plants from four  
25 independent lines of Col-0 expressing the reference allele and three independent lines expressing  
26 *TIR1*<sup>T154S</sup>. (E) Five experimental replicates were performed with T3 plants from five independent lines of  
27 Col-0 expressing the reference allele and six independent lines expressing *TIR1*<sup>T154S</sup>.



1 **Fig 4. *tir1-1* is a dominant negative allele.** Yeast expressing YFP-IAA17 and pairwise combinations of  
2 (A) *TIR1* and *tir1-10* (*tir1*<sup>K159\*</sup>) or (B) *TIR1* and *tir1-1* (*tir1*<sup>G147D</sup>) alleles were treated with various  
3 concentrations of auxin for one hour before YFP-IAA17 fluorescence was measured by flow cytometry.  
4 Mean fluorescence +/- SE was calculated from four experiments. Some error bars are within the points.

## 5 SUPPORTING INFORMATION CAPTIONS

6 **S1 Table. Sequence variation in the AFB gene family.**

7 **S2 Fig. Polymorphisms in the AFB genes of the 170 analyzed accessions.** Using a sliding 5-codon  
8 window, synonymous (blue dotted) and nonsynonymous (red solid) diversity per site was calculated  
9 across each AFB gene for all 170 accessions. A vertical black dotted line separates the F-box and LRR  
10 domain of each gene and also identifies the target site of miR393. Only those genes strongly affected by  
11 miR393 are labeled. Nonsynonymous polymorphisms functionally characterized in this study are  
12 indicated.

13 **S3 Fig. Map of *TIR1* and *AFB2* polymorphic accessions.** The 170 resequenced accessions analyzed  
14 in this study were mapped to the latitude and longitude of their reported collection sites. Each accession  
15 is shown as a transparent grey diamond, such that locations with many accessions appear darker grey.  
16 Accessions containing functionally characterized nonsynonymous polymorphisms in *TIR1* or *AFB2* are  
17 highlighted in pink/purple and cyan/navy respectively, with darker tones representing hypermorphs and  
18 lighter tones representing hypomorphs. (A) Many *TIR1* or *AFB2* polymorphic accessions were collected  
19 across Europe. (B) A cluster of *AFB2* polymorphic accessions was collected around the Great Lakes  
20 region of the United States of America.

21 **S4 Fig. Functional divergence between *TIR1* and *AFB2* results from sequence divergence in the**  
22 **LRR domains.** (A) Schematics of domain swaps between *TIR1* and *AFB2*. Amino acid ranges for each domain  
23 are labeled. Line type legend for panel B is to the left of the schematics. (B) Auxin-induced degradation rates are  
24 encoded by AFB LRR and not F-box domains. Degradation rates of a fluorescently-labeled IAA17 substrate were  
25 measured in yeast expressing wild-type or domain-swapped variants of *TIR1* and *AFB2* and treated with auxin.

1 Data from two independent experiments is shown. Mock-treated controls are shown in grey. Wild-type TIR1 and  
2 TIR1 with an AFB2 F-box domain are indicated in purple, shown as solid and dotted lines respectively. Wild-type  
3 AFB2 and AFB2 with a TIR1 F-box domain are indicated in blue, shown as solid and dotted lines respectively.

4 **S5 Table. Accessions containing nonsynonymous variants in *TIR1* or *AFB2*.**

5 **S6 Fig. Characterization of additional *TIR1* polymorphisms.** Nonsynonymous polymorphisms in the F-  
6 box domain of *TIR1* and with dN/dS value <1 were synthesized and co-expressed in yeast with  
7 fluorescently labeled IAA1 or IAA17. Degradation was assessed using flow cytometry on cultures  
8 exposed to different concentrations of the auxin, indole-3-acetic acid (IAA) for one hour. Error bars  
9 represent 95% confidence intervals around the median fluorescence calculated from three independent  
10 experiments. In many cases, intervals are small enough that they appear as a single line.

11 **S7 Fig. Characterization of additional *AFB2* polymorphisms.** Nonsynonymous polymorphisms in the  
12 F-box domain of *AFB2* and or with dN/dS values <1 were synthesized and co-expressed in yeast with  
13 fluorescently labeled IAA1 or IAA17. Degradation was assessed using flow cytometry on cultures  
14 exposed to different concentrations of the auxin, indole-3-acetic acid (IAA) for one hour. Error bars  
15 represent 95% confidence intervals around the median fluorescence calculated from three independent  
16 experiments. In many cases, intervals are small enough that they appear as a single line.

17 **S8 Fig. *TIR1*<sup>Col</sup> accumulates to similar levels to polymorphic *TIR1* variants in yeast.** Three replicate  
18 lysates of IAA17 and FLAG-tagged *TIR1*-variant expressing yeast strains were subjected to western  
19 blotting. A nonspecific band (\*) is included as a loading control.

20 **S9 Fig. *TIR1* variant expression in transgenic lines.** Triplicate RNA samples were isolated from T3  
21 plants from each independent transformant line and subjected to reverse transcription and quantitative  
22 PCR for *TIR1* and *PP2A* as a control. Mean *TIR1* expression relative to *PP2A* normalized to the average  
23 expression across all *TIR1*<sup>Col</sup> and *TIR1*<sup>T154S</sup> lines is shown. Error bars represent SEM.

24 **S10 Fig. *tir1-10* is an amorph in synthetic auxin-induced degradation assays.** A yeast expression  
25 cassette recapitulating the *tir1-10* allele (*TIR1*<sup>K159\*</sup>) was co-expressed with YFP-IAA17 as a homozygous  
26 diploid and along with full-length *TIR1*<sup>Col</sup> and an empty expression cassette (null). Each yeast strain was

- 1 treated with various concentrations of auxin for one hour during log-phase growth. YFP-IAA17
- 2 fluorescence was measured by flow cytometry. Mean fluorescence +/- SE calculated from four
- 3 experiments are represented by points and error bars respectively. Some error bars are within the points.
- 4 **S11 Appendix. Supplemental information.** Complete analytical methods, detailed protocols and
- 5 additional figures for each section of the main text.

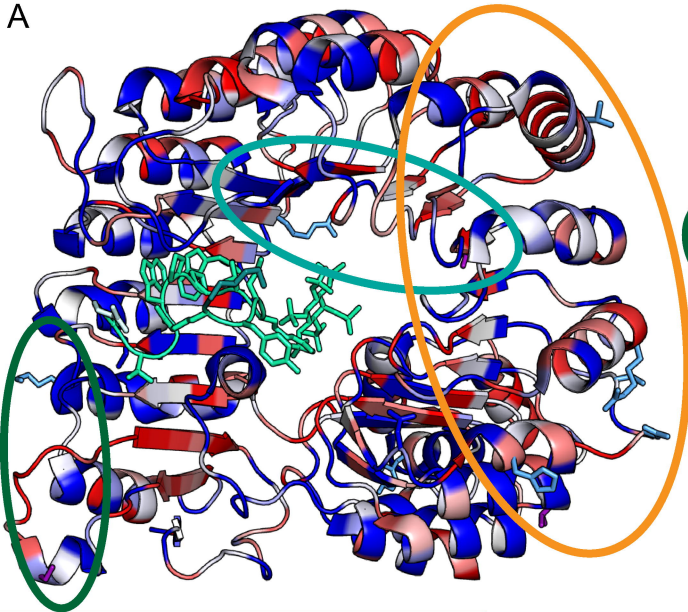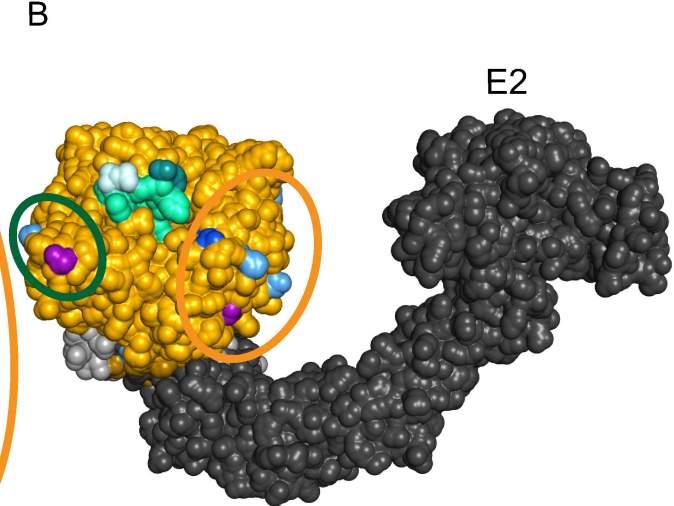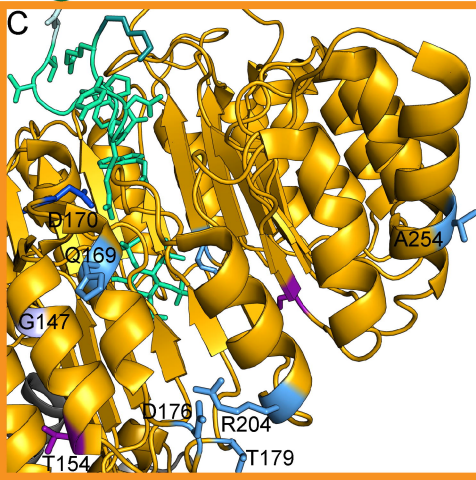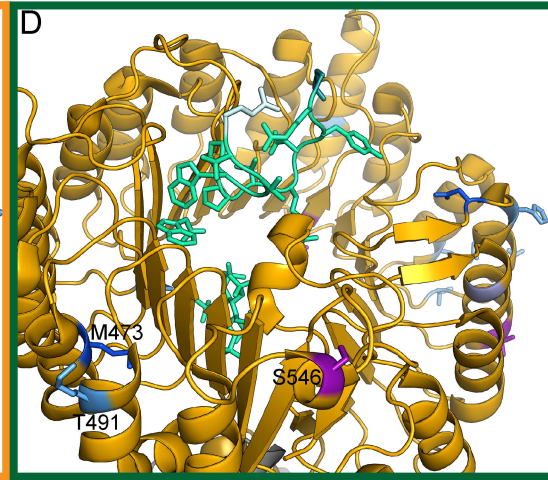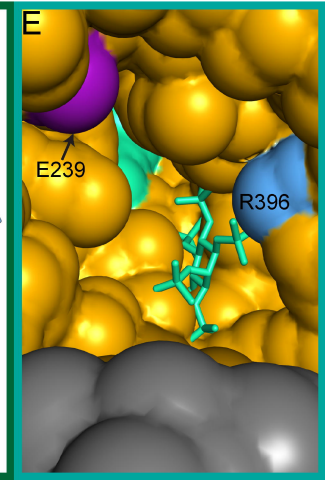

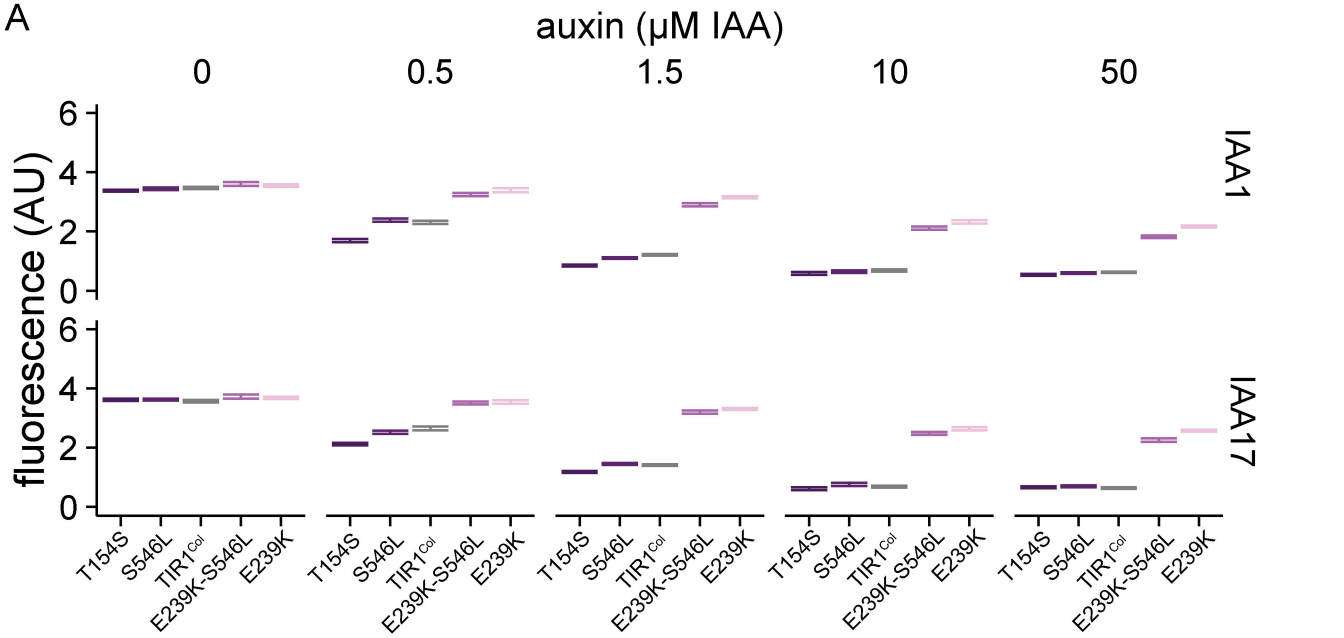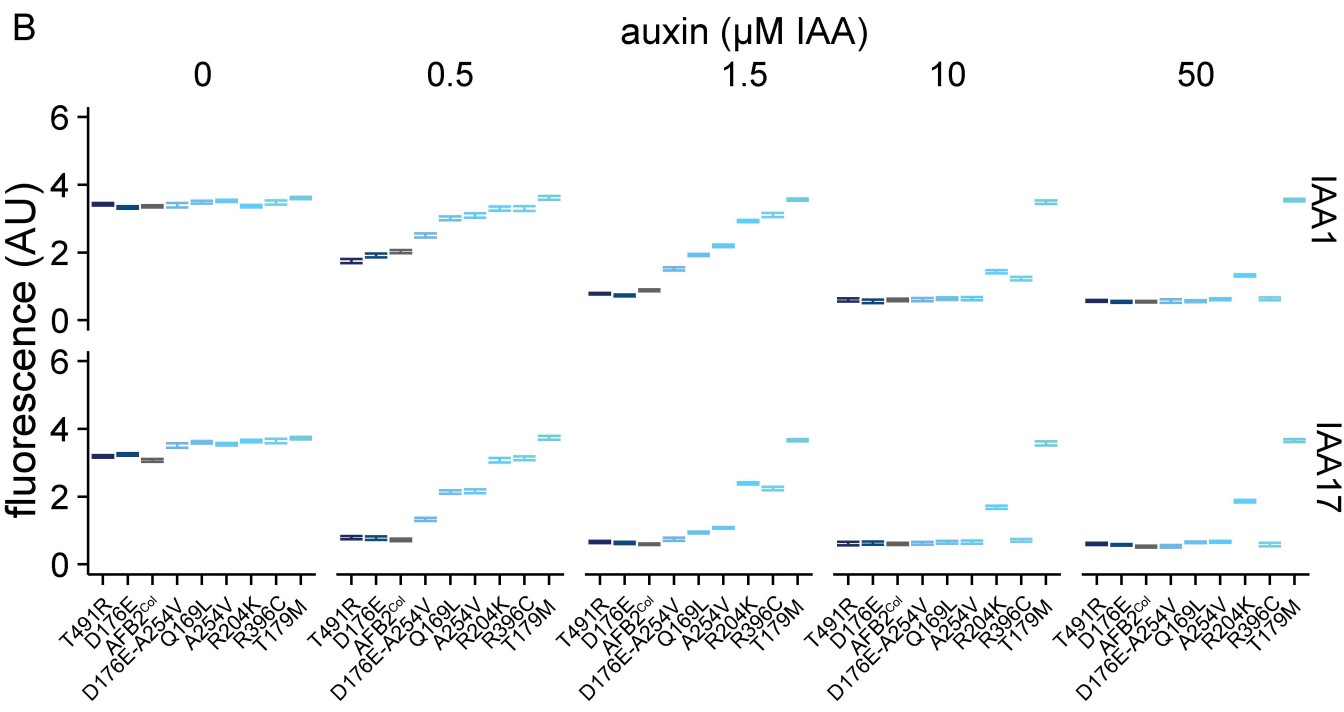

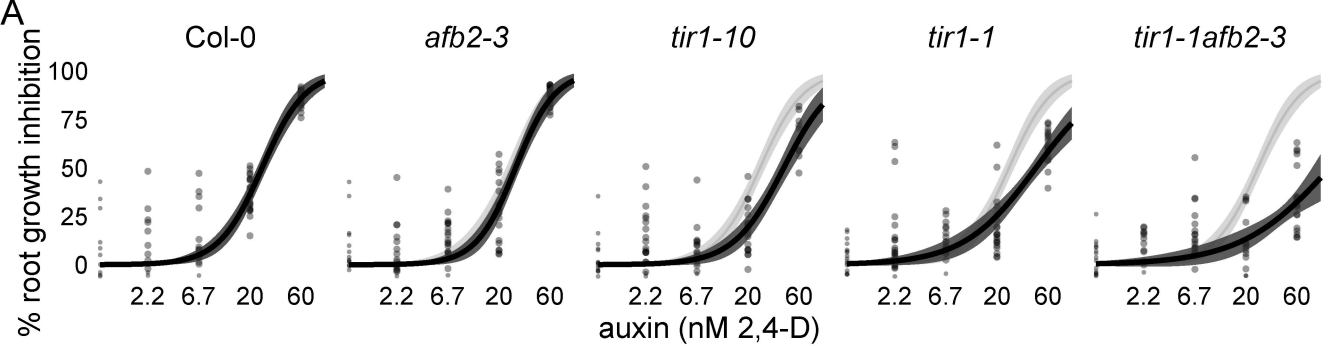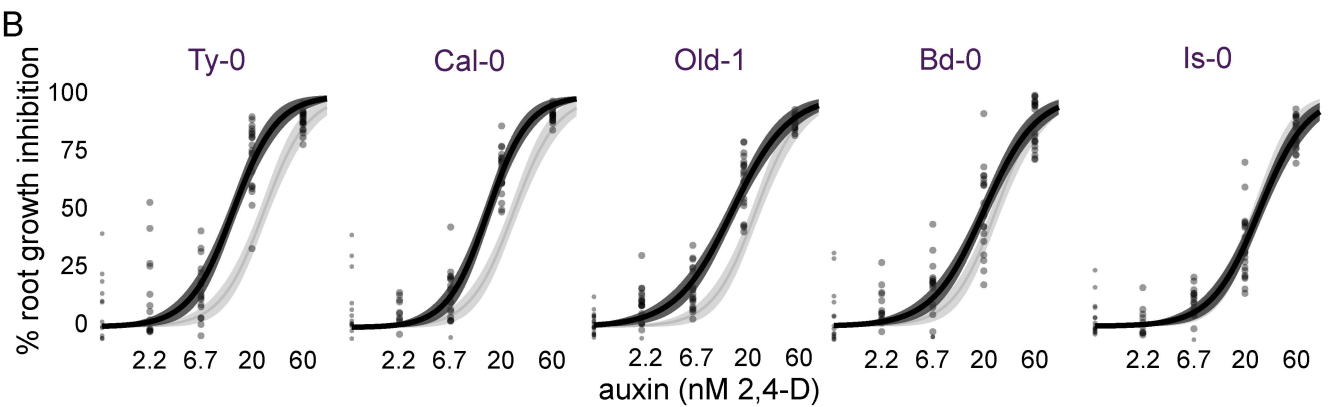

**C**

|                     | gene | mutation    | ED50    | p-value |
|---------------------|------|-------------|---------|---------|
| Ty-0                | TIR1 | T154S       | 13.318  | <0.001  |
| Cal-0               | TIR1 | T154S       | 14.872  | <0.001  |
| Old-1               | TIR1 | T154S       | 15.556  | <0.001  |
| Bd-0                | TIR1 | T154S       | 20.121  | 0.005   |
| Col-0               | -    | -           | 25.922  | NA      |
| Is-0                | TIR1 | T154S       | 27.302  | 0.558   |
| Mc-0                | TIR1 | E239K_S546L | 27.910  | 0.538   |
| <i>afb2-3</i>       | AFB2 | T-DNA       | 28.592  | 0.290   |
| <i>tir1-10</i>      | TIR1 | T-DNA       | 43.203  | <0.001  |
| <i>tir1-1</i>       | TIR1 | G147D       | 46.238  | <0.001  |
| <i>tir1-1afb2-3</i> |      |             | 121.753 | <0.001  |

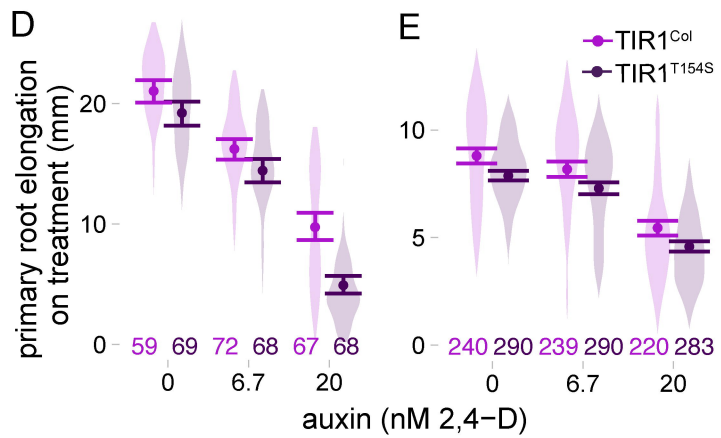

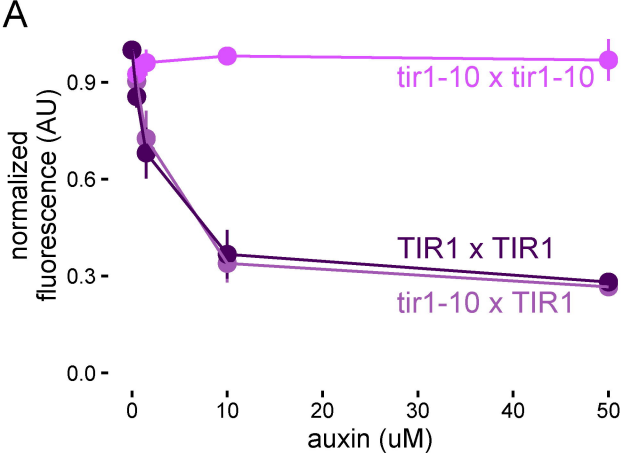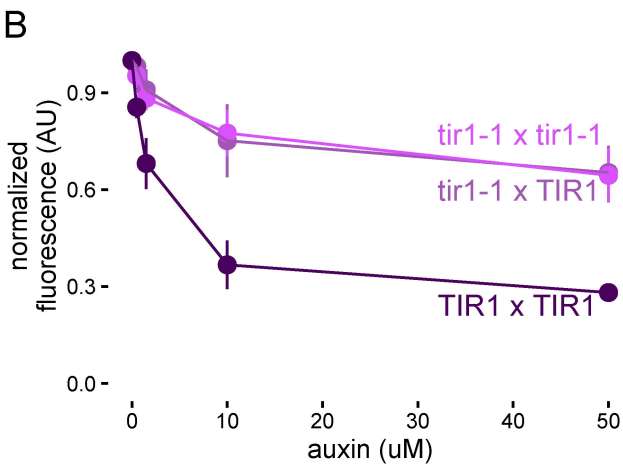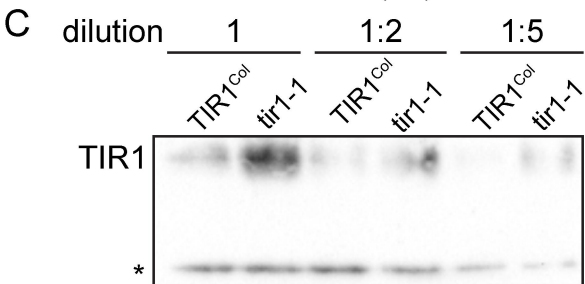

Source: https://www.biorxiv.org/content/10.1101/115667v2.full.pdf
